# Supplementary material for: Determining the Optimal Vacuum Frying Conditions for Silver Herring (Spratelloides gracilis) Using the Response Surface Methodology
Source: MDPI journal article supplement (doi:10.3390/foods12193533), 2023-09-22
Supplement: s1 [file s1]

Table S1. Regression coefficients and analysis of variance (ANOVA) of the response as a function of the independent variables on vacuum fried silver herring.

| $Y$                   | $A_w$     | moisture content (%) | yield (%) | oil content (%) | $L^*$ value | $\Delta E$ | fracturability (g/s) |
|-----------------------|-----------|----------------------|-----------|-----------------|-------------|------------|----------------------|
| $X_1$                 | -0.12     | -0.9                 | -2.09     | -1.1            | 1.73        | 1.72       | -16.13               |
| $X_2$                 | -0.051    | -0.34                | 7.50E-03  | 1.47            | -0.3        | -0.3       | 27.27                |
| $X_3$                 | 0.024     | 0.35                 | 3.53      | -0.88           | -0.5        | -0.53      | 76.29                |
| $X_1 X_2$             | 0.057     | -0.42                | 0.64      | 1.06            | -0.91       | -0.92      | 5.79                 |
| $X_1 X_3$             | -3.25E-03 | 0.12                 | -0.33     | -1.15           | -0.42       | -0.41      | 74.32                |
| $X_2 X_3$             | -6.83E-03 | -0.28                | 0.79      | -0.19           | 0.36        | 0.36       | 9.37                 |
| $X_1^2$               | 0.092     | 0.44                 | 0.35      | 1.17            | -0.062      | -0.094     | 36.2                 |
| $X_2^2$               | 0.077     | 0.25                 | 0.79      | 1.59            | 0.39        | 0.4        | 29.27                |
| $X_3^2$               | -0.04     | 0.14                 | 0.33      | -1.4            | -1.11       | -1.1       | 41.85                |
| Model (F-Value)       | 5.16      | 4.16                 | 4.45      | 5.95            | 4.53        | 4.44       | 2.86                 |
| Model (P-value)       | 0.0428    | 0.0917               | 0.0575    | 0.0319          | 0.0554      | 0.0576     | 0.13                 |
| $R^2$                 | 0.9028    | 0.9034               | 0.889     | 0.9146          | 0.8908      | 0.8888     | 0.8373               |
| Lack of Fit (P-value) | 0.0526    | 0.1554               | 0.0585    | 0.744           | 0.8873      | 0.9056     | 0.524                |

Table S2. The experimental results of the central composite rotatable design for VF silver herring.

| Run | VF temperature (°C) | VF duration (min) | maltose concentration (%) | $A_w$     | moisture content (%) | yield (%)  | oil content (%) | $L^*$ value | $\Delta E$ | fracturability (g/s) |
|-----|---------------------|-------------------|---------------------------|-----------|----------------------|------------|-----------------|-------------|------------|----------------------|
| 1   | 75                  | 25                | 15                        | 0.63±0.01 | 7.7±0.23             | 25.24±2.11 | 27.78±2.47      | 24.65±1.43  | 24.82±1.23 | 279±18.34            |
| 2   | 105                 | 25                | 15                        | 0.21±0.01 | 2.8±0.40             | 20.06±1.95 | 23.66±1.49      | 30.56±1.80  | 30.73±1.71 | 342±25.12            |
| 3   | 75                  | 45                | 15                        | 0.34±0.01 | 4.47±0.29            | 26.84±1.45 | 29.62±1.77      | 25.89±1.49  | 26.14±1.57 | 289±39.78            |
| 4   | 105                 | 45                | 15                        | 0.14±0.01 | 1.69±0.10            | 24.22±1.67 | 29.73±4.17      | 28.16±1.19  | 28.37±1.07 | 311±9.77             |
| 5   | 75                  | 35                | 0                         | 0.26±0.01 | 3.57±0.10            | 21.78±1.34 | 25.44±0.84      | 24.66±1.58  | 24.86±1.89 | 448±28.65            |
| 6   | 75                  | 35                | 30                        | 0.34±0.02 | 4.32±0.33            | 29.96±0.45 | 26.38±0.21      | 24.13±2.05  | 24.34±1.91 | 621±40.11            |
| 7   | 105                 | 35                | 0                         | 0.09±0.01 | 1.94±0.15            | 17.96±0.31 | 25.33±0.60      | 28.33±1.07  | 28.49±1.11 | 312±24.78            |
| 8   | 105                 | 35                | 30                        | 0.16±0.01 | 3.16±0.39            | 24.84±0.82 | 21.69±1.03      | 26.13±1.52  | 26.34±1.20 | 359±34.87            |
| 9   | 90                  | 25                | 0                         | 0.19±0.01 | 3.11±0.13            | 23.00±0.92 | 25.07±1.04      | 27.25±0.87  | 27.62±0.99 | 631±31.33            |
| 10  | 90                  | 25                | 30                        | 0.23±0.01 | 4.10±0.18            | 28.00±0.33 | 23.27±0.07      | 25.88±0.66  | 26.09±0.78 | 789±36.77            |

|    |    |    |    |           |           |             |            |            |            |           |
|----|----|----|----|-----------|-----------|-------------|------------|------------|------------|-----------|
| 11 | 90 | 45 | 0  | 0.18±0.01 | 2.58±0.27 | 18.57±0.21  | 27.37±0.34 | 25.92±0.80 | 26.2±0.87  | 289±28.32 |
| 12 | 90 | 45 | 30 | 0.19±0.01 | 2.44±0.26 | 26.73±0.48  | 24.81±0.86 | 26.00±2.41 | 26.13±2.10 | 531±35.45 |
| 13 | 90 | 35 | 15 | 0.15±0.01 | 2.46±0.08 | 23.60±1.51  | 25.81±1.04 | 25.52±0.85 | 25.7±0.70  | 428±23.28 |
| 14 | 90 | 35 | 15 | 0.14±0.01 | 2.56±0.16 | 22.84±1.01  | 23.38±0.82 | 27.38±1.80 | 27.63±1.99 | 431±16.17 |
| 15 | 90 | 35 | 15 | 0.16±0.01 | 2.98±0.29 | 22.436±0.21 | 25.64±0.76 | 28.06±0.66 | 28.29±0.78 | 457±21.11 |

X<sub>1</sub> = VF temperature (°C), X<sub>2</sub> = VF duration (min), X<sub>3</sub> = Maltose concentration (%);The VF measurement of each samples was performed in triplicate.

Table S3. The predicted results of the central composite rotatable design for VF silver herring.

| Run | VF<br>temperature<br>(°C) | VF<br>duration<br>(min) | maltose<br>concentration<br>(%) | Aw    | moisture<br>content<br>(%) | yield<br>(%) | oil<br>content(%) | L*<br>value | ΔE    | fracturability<br>(g/s) |
|-----|---------------------------|-------------------------|---------------------------------|-------|----------------------------|--------------|-------------------|-------------|-------|-------------------------|
| 1   | 75                        | 25                      | 15                              | 0.629 | 7.698                      | 25.240       | 27.7805           | 24.648      | 24.82 | 279                     |
| 2   | 105                       | 25                      | 15                              | 0.206 | 2.803                      | 20.060       | 23.6644           | 30.562      | 30.73 | 342                     |
| 3   | 75                        | 45                      | 15                              | 0.336 | 4.740                      | 26.840       | 29.6233           | 25.892      | 26.14 | 289                     |
| 4   | 105                       | 45                      | 15                              | 0.141 | 1.687                      | 24.220       | 29.7282           | 28.162      | 28.37 | 311                     |
| 5   | 75                        | 35                      | 0                               | 0.259 | 3.573                      | 21.780       | 25.4381           | 24.656      | 24.86 | 448                     |
| 6   | 75                        | 35                      | 30                              | 0.336 | 4.317                      | 29.960       | 26.3776           | 24.128      | 24.34 | 621                     |
| 7   | 105                       | 35                      | 0                               | 0.092 | 1.940                      | 17.960       | 25.3330           | 28.326      | 28.49 | 312                     |
| 8   | 105                       | 35                      | 30                              | 0.157 | 3.163                      | 24.840       | 21.6902           | 26.126      | 26.34 | 359                     |
| 9   | 90                        | 25                      | 0                               | 0.190 | 3.113                      | 23.000       | 25.0691           | 27.25       | 27.62 | 631                     |
| 10  | 90                        | 25                      | 30                              | 0.228 | 4.097                      | 28.000       | 23.2746           | 25.88       | 26.09 | 789                     |
| 11  | 90                        | 45                      | 0                               | 0.179 | 2.577                      | 18.570       | 27.3727           | 25.924      | 26.20 | 289                     |
| 12  | 90                        | 45                      | 30                              | 0.190 | 2.437                      | 26.730       | 24.8138           | 26.0013     | 26.13 | 531                     |
| 13  | 90                        | 35                      | 15                              | 0.154 | 2.460                      | 23.600       | 25.8091           | 25.522      | 25.70 | 428                     |
| 14  | 90                        | 35                      | 15                              | 0.142 | 2.557                      | 22.840       | 23.3836           | 27.378      | 27.63 | 431                     |
| 15  | 90                        | 35                      | 15                              | 0.164 | 2.980                      | 22.436       | 25.6433           | 28.058      | 28.29 | 457                     |

X<sub>1</sub> = VF temperature (°C), X<sub>2</sub> = VF duration (min), X<sub>3</sub> = Maltose concentration (%).
